# Supplementary material for: Development of an intergeneric hybrid between Oryza sativa L. and Leersia perrieri (A. Camus) Launert
Source: PubMed Central journal article supplement — Breed Sci. 2018 Aug 23;68(4):474–80. doi: 10.1270/jsbbs.18045 (PMC6198897; doi:10.1270/jsbbs.18045), 2018-08-23
Supplement: 68_18045_1.pdf [file 68_18045_1.pdf]

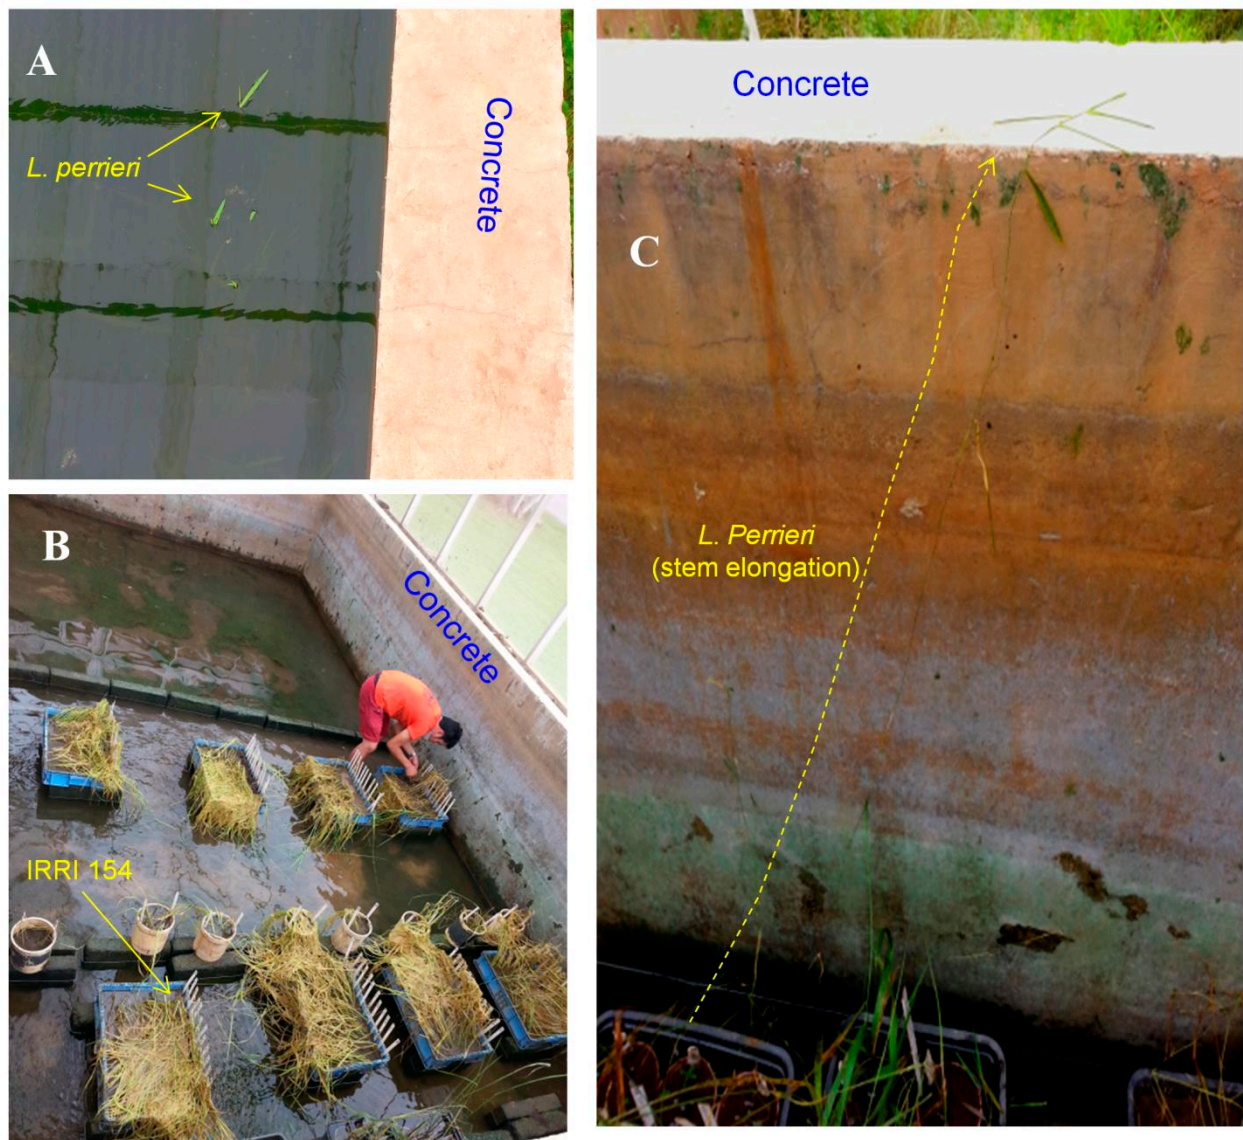

**Supplemental Fig. 1.** Submergence screening. (A) Phenotype of *L. perrieri* at 18 days after submergence. Uppermost shoot of *L. perrieri* emerged above water level. (B) Drained experimental tank at 21 days after submergence. (C) Phenotype of *L. perrieri* at the drained tank. The elongated internode of *L. perrieri* is shown like a green line (right side of the yellow dotted line).
