# Supplementary material for: Development of an intergeneric hybrid between Oryza sativa L. and Leersia perrieri (A. Camus) Launert
Source: PubMed Central journal article supplement — Breed Sci. 2018 Aug 23;68(4):474–80. doi: 10.1270/jsbbs.18045 (PMC6198897; doi:10.1270/jsbbs.18045), 2018-08-23
Supplement: 68_18045_2.pdf [file 68_18045_2.pdf]

**Supplemental Table 1.** Information of the newly designed DNA markers in this study

| Chromosome | Marker     | Forward primer<br>(5' to 3') | Reverse primer<br>(5' to 3') | Expected size (bp)<br>Nipponbare<br>/ <i>L. perrieri</i> |
|------------|------------|------------------------------|------------------------------|----------------------------------------------------------|
| 1          | Lp01-00504 | AGCAAAAGGGATCATTCAACG        | GTAGGCATGAACCTGTGAAC         | 306 / 357                                                |
| 2          | Lp02-00510 | GAGCTATCTTCTTAACCTGGT        | GAATTCGCTTGCTTCCGAA          | 216 / 258                                                |
| 3          | Lp03-00636 | ATGATTCGATGGTGCAATCTG        | TAGCTCTCATGGTTGTTGCA         | 360 / 288                                                |
| 4          | Lp04-00646 | TACCTTGTTTCTGAGATGA          | CAACATATTGCCCTTCAAGGT        | 222 / 255                                                |
| 5          | Lp05-00637 | TCAGCAAGCAAACATGTTGCA        | ACCTGAAGACGGACAACATC         | 233 / 263                                                |
| 6          | Lp06-00631 | TGATCAATTGGGACACACTG         | GCACTCATTCTGAAAATGAGG        | 241 / 280                                                |
| 7          | Lp07-00701 | TTCAGTGGAARGCTTTCTGCA        | TCTCCTCCTCACTTCCAGGT         | 412 / 335                                                |
| 8          | Lp08-00703 | CTCAAGCTSCTCATCGTCAC         | AGCTTCTCCTCGTTCTGATC         | 261 / 346                                                |
| 9          | Lp09-00652 | ACCGGCAATGATAAAACTGCT        | TGTCGGTTTGTTCGGTTGGT         | 214 / 170                                                |
| 10         | Lp10-00840 | GCGAAGACGAAAAATCCAGT         | ACTGCTGAAGACCACGAGTG         | 313 / 265                                                |
| 11         | Lp11-28715 | GGAGATAATTCTCGGTGTGTG        | TGGCTGGTTCGTTCTCTCAC         | 239 / 268                                                |
| 12         | Lp12-27020 | CTCTGAATACTTGCAGATGCA        | GGTGATTAGGATTAGATGCT         | 184 / 154                                                |
